# Supplementary material for: Risk Assessment of Phthalate Esters in Baiyangdian Lake and Typical Rivers in China
Source: MDPI journal article supplement (doi:10.3390/toxics11020180), 2023-02-15
Supplement: s1 [file s1]

## **Supplementary Material**

### **Risk Assessment of Phthalate Esters in Baiyangdian Lake and Typical Rivers in China**

Yin Hou <sup>1,2</sup>, Mengchen Tu <sup>1</sup>, Cheng Li <sup>3</sup>, Xinyu Liu <sup>1</sup>, Chao Wei <sup>1</sup>, Jing Wang <sup>1,2</sup>, Xin Zheng <sup>1,\*</sup> and Yihong Wu <sup>3,\*</sup>

<sup>1</sup> State Key Laboratory of Environmental Criteria and Risk Assessment, Chinese Research Academy of Environmental Sciences, Beijing 100012, China

<sup>2</sup> College of Marine Ecology and Environment, Shanghai Ocean University, Shanghai 201306, China

<sup>3</sup> Institute of Green Development, Hebei provincial Academy of Environmental Sciences, Shijiazhuang, 050037, China

\* Correspondence: zhengxin@craes.org.cn (X.Z.); yh\_wuhb@126.com (Y.W.)

**Table S1.** Characterization of 7 PAEs investigated

| Phthalate esters            | Acronym | CAS      | Alkyl-<br>chain<br>length | Molecular<br>formula                           | Molecular<br>weight | Solubility<br>in water<br>(mg/L) | LgK <sub>ow</sub> | K <sub>oc</sub><br>(L/kg) |
|-----------------------------|---------|----------|---------------------------|------------------------------------------------|---------------------|----------------------------------|-------------------|---------------------------|
| Dimethyl phthalate          | DMP     | 131-11-3 | 1                         | C <sub>10</sub> H <sub>10</sub> O <sub>4</sub> | 194                 | 2014                             | 1.61              | 40                        |
| Diethyl phthalate           | DEP     | 84-66-2  | 2                         | C <sub>12</sub> H <sub>14</sub> O <sub>4</sub> | 222                 | 287                              | 2.24              | 69                        |
| Diisobutyl phthalate        | DIBP    | 84-69-5  | 3                         | C <sub>16</sub> H <sub>22</sub> O <sub>4</sub> | 278                 | 0.00                             | 4.11              | -                         |
| Dibutyl phthalate           | DBP     | 84-74-2  | 4                         | C <sub>16</sub> H <sub>22</sub> O <sub>4</sub> | 278                 | 2.35                             | 4.27              | 1380                      |
| Butyl benzyl phthalate      | BBP     | 85-68-7  | 4                         | C <sub>19</sub> H <sub>20</sub> O <sub>4</sub> | 312                 | 0.95                             | 4.70              | 5248                      |
| Di-n-octyl phthalate        | DOP     | 117-84-0 | 8                         | C <sub>24</sub> H <sub>38</sub> O <sub>4</sub> | 390                 | 0.00                             | 8.18              | 23988                     |
| Bis(2-ethylhexyl) phthalate | DEHP    | 117-81-7 | 8                         | C <sub>20</sub> H <sub>14</sub> O <sub>4</sub> | 390                 | 0.00                             | 7.73              | 87096                     |

-: No data

**Table S2.** Reproductive toxicity data used to construct SSDs of DEHP, BBP, DEP, and DBP

| Phthalate esters | Test species                           | Duration (days) | Endpoint         | Measurement | Con. (µg/L) | Reference                 |
|------------------|----------------------------------------|-----------------|------------------|-------------|-------------|---------------------------|
| DEHP             | <i>Eurytemora affinis</i>              | 21              | NOEC             | REP         | 109         | Forget-Leray, et al, 2005 |
|                  | <i>Oryzias melastigma</i>              | 180             | LOEC             | MPH         | 100         | Ye, et al, 2014           |
|                  | <i>Oryzias latipes</i>                 | 91              | NOEC             | REP         | 1           | Kim et al, 2002           |
|                  | <i>Salvelinus fontinalis</i>           | 150             | NOEC             | MPH         | 3.7         | Mayer et al,1977          |
|                  | <i>Daphnia magna</i>                   | 21              | NOEC             | REP         | 640         | Adams and Heidolph,1985   |
|                  | <i>Gobiocypris rarus</i>               | 21              | NOEC             | MPH         | 3.6         | Wang, et al, 2013         |
|                  | <i>Danio rerio</i>                     | 21              | LOEC             | REP         | 20          | Carnevali, et al, 2010    |
|                  | <i>Pimephales promelas</i>             | 28              | NOEC             | MPH         | 12          | Crago and Klaper, 2012    |
|                  | <i>Poecilia reticulata</i>             | 28              | NOEC             | MPH         | 320         | Adema and Zwart, 1984     |
|                  | <i>Oncorhynchus mykiss</i>             | 42              | NOEC             | GRO         | 502         | Spehar, R.L., 1986        |
|                  | <i>Pseudokirchneriella subcapitata</i> | 5               | EC <sub>50</sub> | POP         | 960         | Richter,1982              |

| Phthalate esters | Test species                           | Duration (days) | Endpoint         | Measurement | Con. (µg/L) | Reference              |
|------------------|----------------------------------------|-----------------|------------------|-------------|-------------|------------------------|
| DBP              | <i>Hydra viridissima</i>               | 7               | NOEC             | POP         | 10          | Ganeshakumar, M., 2009 |
|                  | <i>Oncorhynchus mykiss</i>             | 99              | NOEC             | GRO         | 100         | Rhodes, et al, 1995    |
|                  | <i>Gasterosteus aculeatus</i>          | 22              | NOEC             | GRO         | 35.2        | Aoki, et al, 2011      |
|                  | <i>Melanotaenia fluviatilis</i>        | 7               | NOEC             | REP         | 14          | Bhatia, et al, 2014    |
|                  | <i>Glandirana rugosa</i>               | 21              | NOEC             | MPH         | 278         | Ohtani et al., 2000    |
|                  | <i>Xenopus laevis</i>                  | 266             | NOEC             | MPH         | 1000        | Higuchi, 2002          |
|                  | <i>Daphnia magna</i>                   | 21              | NOEC             | REP         | 960         | Kuhn, et al, 1989      |
|                  | <i>Danio rerio</i>                     | 95              | NOEC             | GRO         | 400         | Chen et al., 2015      |
|                  | <i>Pimephales promelas</i>             | 14              | NOEC             | GRO         | 500         | Weston et al., 2009    |
|                  | <i>Pseudokirchneriella subcapitata</i> | 4               | NOEC             | POP         | 210         | Adams, et al, 1995     |
|                  | <i>Scenedesmus subspicatus</i>         | 3               | NOEC             | POP         | 500         | Scholz, N., 1995       |
|                  | <i>Chlorella vulgaris</i>              | 4               | EC <sub>50</sub> | POP         | 7780        | Chi et al, 2006        |

| Phthalate esters | Test species                           | Duration (days) | Endpoint         | Measurement | Con. (µg/L) | Reference                       |
|------------------|----------------------------------------|-----------------|------------------|-------------|-------------|---------------------------------|
| BBP              | <i>Scenedesmus acutus</i>              | 3               | NOEC             | POP         | 30200       | Kuang et al,2003                |
|                  | <i>Lemna minor</i>                     | 7               | LOEC             | MPH         | 5           | Huang et al., 2006              |
|                  | <i>Ceratophyllum demersum</i>          | 25              | NOEC             | BIO         | 150         | Li et al., 2006                 |
|                  | <i>Pseudokirchneriella subcapitata</i> | 4               | NOEC             | POP         | 60          | USEPA, 1978                     |
|                  | <i>Daphnia magna</i>                   | 20              | NOEC             | REP         | 170         | E.G. and G. Bionomics, 1979     |
|                  | <i>Fundulus heteroclitus</i>           | 28              | NOEC             | GRO         | 100         | Kaplan,et al,2013               |
|                  | <i>Navicula pelliculosa</i>            | 4               | EC <sub>50</sub> | POP         | 600         | Gledhill,1980                   |
|                  | <i>Anacystis aeruginosa</i>            | 4               | EC <sub>50</sub> | POP         | 1000        | Gledhill,1980                   |
|                  | <i>Ipomoea aquatica</i>                | 28              | NOEC             | GRO         | 50000       | Chen,et al,2011                 |
| DEP              | <i>Pimephales promelas</i>             | 21              | NOEC             | FEC         | 64.6        | Hicks, 2008                     |
|                  | <i>Chlamydomonas reinhardtii</i>       | 3               | EC10             | POP         | 1020        | Brack, W., and H. Rottler, 1994 |
|                  | <i>Pseudokirchneriella subcapitata</i> | 4               | NOEC             | POP         | 3650        | Adams, et al, 1995              |

| Phthalate esters | Test species                   | Duration (days) | Endpoint         | Measurement | Con. (µg/L) | Reference              |
|------------------|--------------------------------|-----------------|------------------|-------------|-------------|------------------------|
|                  | <i>Daphnia magna</i>           | 21              | NOEC             | REP         | 3800        | Kuhn, et al, 1989      |
|                  | <i>Cyprinus carpio</i>         | 28              | LOEC             | MPH         | 1000        | Barse, et al, 2007     |
|                  | <i>Tetrahymena thermophila</i> | 2               | NOEC             | POP         | 40000       | Pauli, et al, 1993     |
|                  | <i>Danio rerio</i>             | 3.8             | NOEC             | REP         | 427.2       | Xu et al,2013          |
|                  | <i>Anodonta cygnea</i>         | 4               | EC <sub>50</sub> | POP         | 16000       | Adams and Gorsuch,1995 |
|                  | <i>Scenedesmus subspicatus</i> | 4               | EC <sub>50</sub> | POP         | 21000       | Kuhn et al,1989        |

POP: population growth rate, REP: reproduction, GRO: growth, MPH: morphology, BEH: behavior, FEC: fecundity, BIO: Biochemistry.

**Table S3.** The average chronic toxicity value and cumulative frequency of DEHP, BBP, DEP, and DBP

| Phthalate esters | Test species             | Endpoint | Con. (µg/L) | CVE (µg/L) | lg(CVE) (µg/L) | R | f | F <sub>R</sub> (%) |
|------------------|--------------------------|----------|-------------|------------|----------------|---|---|--------------------|
| DEHP             | <i>Oryzias latipes</i>   | NOEC     | 1           | 1          | 0              | 1 | 1 | 7.7                |
|                  | <i>Gobiocypris rarus</i> | NOEC     | 3.6         | 1.897      | 0.278          | 2 | 1 | 15.4               |

| Phthalate esters | Test species                           | Endpoint         | Con. (µg/L) | CVE (µg/L) | lg(CVE) (µg/L) | R  | f | F <sub>R</sub> (%) |
|------------------|----------------------------------------|------------------|-------------|------------|----------------|----|---|--------------------|
| DBP              | <i>Salvelinus fontinalis</i>           | NOEC             | 3.7         | 1.924      | 0.284          | 3  | 1 | 23.1               |
|                  | <i>Hydra viridissima</i>               | NOEC             | 10          | 3.162      | 0.500          | 4  | 1 | 30.8               |
|                  | <i>Pimephales promelas</i>             | NOEC             | 12          | 3.464      | 0.540          | 5  | 1 | 38.5               |
|                  | <i>Danio rerio</i>                     | LOEC             | 20          | 4.472      | 0.651          | 6  | 1 | 46.2               |
|                  | <i>Oryzias melastigma</i>              | LOEC             | 100         | 10         | 1.000          | 7  | 1 | 53.8               |
|                  | <i>Eurytemora affinis</i>              | NOEC             | 109         | 10.440     | 1.019          | 8  | 1 | 61.5               |
|                  | <i>Poecilia reticulata</i>             | NOEC             | 320         | 17.889     | 1.253          | 9  | 1 | 69.2               |
|                  | <i>Oncorhynchus mykiss</i>             | NOEC             | 502         | 22.405     | 1.350          | 10 | 1 | 76.9               |
|                  | <i>Daphnia magna</i>                   | NOEC             | 640         | 25.298     | 1.403          | 11 | 1 | 84.6               |
|                  | <i>Pseudokirchneriella subcapitata</i> | EC <sub>50</sub> | 960         | 30.984     | 1.491          | 12 | 1 | 92.3               |
|                  | <i>Lemna minor</i>                     | LOEC             | 5           | 2.236      | 0.350          | 1  | 1 | 6.7                |
|                  | <i>Melanotaenia fluviatilis</i>        | NOEC             | 14          | 3.742      | 0.573          | 2  | 1 | 13.3               |

| Phthalate esters | Test species                           | Endpoint         | Con. (µg/L) | CVE (µg/L) | lg(CVE) (µg/L) | R  | f | F <sub>R</sub> (%) |
|------------------|----------------------------------------|------------------|-------------|------------|----------------|----|---|--------------------|
|                  | <i>Gasterosteus aculeatus</i>          | NOEC             | 35.2        | 5.932      | 0.773          | 3  | 1 | 20                 |
|                  | <i>Oncorhynchus mykiss</i>             | NOEC             | 100         | 10         | 1.000          | 4  | 1 | 26.7               |
|                  | <i>Ceratophyllum demersum</i>          | NOEC             | 150         | 12.247     | 1.088          | 5  | 1 | 33.3               |
|                  | <i>Pseudokirchneriella subcapitata</i> | NOEC             | 210         | 14.491     | 1.161          | 6  | 1 | 40                 |
|                  | <i>Glandirana rugosa</i>               | NOEC             | 278         | 16.673     | 1.222          | 7  | 1 | 46.7               |
|                  | <i>Danio rerio</i>                     | NOEC             | 400         | 20         | 1.301          | 8  | 1 | 53.3               |
|                  | <i>Scenedesmus subspicatus</i>         | NOEC             | 500         | 22.361     | 1.350          | 9  | 1 | 60                 |
|                  | <i>Pimephales promelas</i>             | NOEC             | 500         | 22.361     | 1.350          | 10 | 1 | 66.7               |
|                  | <i>Daphnia magna</i>                   | NOEC             | 960         | 30.984     | 1.491          | 11 | 1 | 73.3               |
|                  | <i>Xenopus laevis</i>                  | NOEC             | 1000        | 31.623     | 1.500          | 12 | 1 | 80                 |
|                  | <i>Chlorella vulgaris</i>              | EC <sub>50</sub> | 7780        | 88.204     | 1.945          | 13 | 1 | 86.7               |
|                  | <i>Scenedesmus acutus</i>              | NOEC             | 30200       | 173.781    | 2.240          | 14 | 1 | 93.3               |

| Phthalate esters | Test species                           | Endpoint         | Con. (µg/L) | CVE (µg/L) | lg(CVE) (µg/L) | R | f | F <sub>R</sub> (%) |
|------------------|----------------------------------------|------------------|-------------|------------|----------------|---|---|--------------------|
| BBP              | <i>Pseudokirchneriella subcapitata</i> | NOEC             | 60          | 7.476      | 0.874          | 1 | 1 | 12.5               |
|                  | <i>Pimephales promelas</i>             | NOEC             | 64.6        | 8.037      | 0.905          | 2 | 1 | 25                 |
|                  | <i>Fundulus heteroclitus</i>           | NOEC             | 100         | 10         | 1.000          | 3 | 1 | 37.5               |
|                  | <i>Daphnia magna</i>                   | NOEC             | 170         | 13.038     | 1.115          | 4 | 1 | 50                 |
|                  | <i>Navicula pelliculosa</i>            | EC <sub>50</sub> | 600         | 24.495     | 1.389          | 5 | 1 | 62.5               |
|                  | <i>Anacystis aeruginosa</i>            | EC <sub>50</sub> | 1000        | 31.623     | 1.500          | 6 | 1 | 75                 |
|                  | <i>Ipomoea aquatica</i>                | NOEC             | 50000       | 223.607    | 2.349          | 7 | 1 | 87.5               |
| DEP              | <i>Danio rerio</i>                     | NOEC             | 427.2       | 20.669     | 1.315          | 1 | 1 | 11.1               |
|                  | <i>Cyprinus carpio</i>                 | LOEC             | 1000        | 31.623     | 1.500          | 2 | 1 | 22.2               |
|                  | <i>Chlamydomonas reinhardtii</i>       | EC <sub>10</sub> | 1020        | 31.937     | 1.504          | 3 | 1 | 33.3               |
|                  | <i>Pseudokirchneriella subcapitata</i> | NOEC             | 3650        | 60.415     | 1.781          | 4 | 1 | 44.4               |
|                  | <i>Daphnia magna</i>                   | NOEC             | 3800        | 61.644     | 1.790          | 5 | 1 | 55.5               |

| Phthalate esters | Test species                   | Endpoint         | Con. (µg/L) | CVE (µg/L) | lg(CVE) (µg/L) | R | f | F <sub>R</sub> (%) |
|------------------|--------------------------------|------------------|-------------|------------|----------------|---|---|--------------------|
|                  | <i>Anodonta cygnea</i>         | EC <sub>50</sub> | 16000       | 126.491    | 2.102          | 6 | 1 | 66.6               |
|                  | <i>Scenedesmus subspicatus</i> | EC <sub>50</sub> | 21000       | 144.914    | 2.161          | 7 | 1 | 77.7               |
|                  | <i>Tetrahymena thermophila</i> | NOEC             | 40000       | 200        | 2.301          | 8 | 1 | 88.8               |

**Table S4.**Exposure concentrations and HQ values of  $\Sigma_3$  PAEs in Baiyangdian Lake

| Number | Sampling site           | Functional area | DIBP       |      | DBP        |      | DEHP       |      |
|--------|-------------------------|-----------------|------------|------|------------|------|------------|------|
|        |                         |                 | EEC (µg/L) | HQ   | EEC (µg/L) | HQ   | EEC (µg/L) | HQ   |
| 1      | Qi li zhuang liu wharf  | living area     | 0.10       | 0.11 | 0.19       | 0.20 | 0.49       | 1.69 |
| 2      | Zao lin zhuang          | living area     | 0.18       | 0.20 | 0.27       | 0.29 | 0.71       | 2.45 |
| 3      | Guang dian zhang zhuang | living area     | 0.15       | 0.17 | 0.28       | 0.30 | 0.83       | 2.86 |
| 4      | Wang jia sai            | tourism area    | 0.06       | 0.07 | 0.12       | 0.13 | 0.23       | 0.79 |
| 5      | Shao che dian           | tourism area    | 0.13       | 0.14 | 0.19       | 0.20 | 0.27       | 0.93 |

|    |                                 |                |       |      |      |      |      |      |
|----|---------------------------------|----------------|-------|------|------|------|------|------|
| 6  | Wei hua yuan                    | tourism area   | 0.10  | 0.11 | 0.15 | 0.16 | 0.64 | 2.21 |
| 7  | Nan liu zhuang                  | tourism area   | 0.16  | 0.18 | 0.30 | 0.32 | 0.38 | 1.31 |
| 8  | Quan tou                        | living area    | 0.13  | 0.14 | 0.21 | 0.22 | 0.51 | 1.76 |
| 9  | Xiao bai yang dian duan cun nan | breeding area  | 0.16  | 0.18 | 0.17 | 0.18 | 0.41 | 1.41 |
| 10 | Dong li zhuang                  | breeding area  | 0.09  | 0.10 | 0.17 | 0.18 | 0.19 | 0.66 |
| 11 | Shi hou dian                    | breeding area  | 0.10  | 0.11 | 0.19 | 0.20 | 0.24 | 0.83 |
| 12 | Cai pu tai                      | living area    | 0.19  | 0.21 | 0.21 | 0.22 | 0.31 | 1.07 |
| 13 | Jin long dian                   | living area    | 0.19  | 0.21 | 0.24 | 0.26 | 0.42 | 1.45 |
| 14 | Zhu long he ru dian kou         | living area    | 0.16  | 0.18 | 0.36 | 0.38 | 0.31 | 1.07 |
| 15 | Zao zuo dian                    | primitive area | 0.074 | 0.08 | 0.19 | 0.20 | 0.26 | 0.90 |
| 16 | Bai gou yin ru dian kou         | inflow area    | 0.25  | 0.28 | 0.46 | 0.49 | 0.50 | 1.72 |
| 17 | Jiao cha kou xia                | inflow area    | 0.25  | 0.28 | 0.35 | 0.37 | 0.32 | 1.10 |
| 18 | Xiao li zhen                    | inflow area    | 0.19  | 0.21 | 0.23 | 0.24 | 0.39 | 1.34 |

|    |                          |             |      |      |      |      |      |      |
|----|--------------------------|-------------|------|------|------|------|------|------|
| 19 | Bei pu bu he ru dian kou | inflow area | 0.13 | 0.14 | 0.22 | 0.23 | 0.41 | 1.41 |
| 20 | Nan pu bu he ru dian kou | inflow area | 0.17 | 0.19 | 0.24 | 0.26 | 0.25 | 0.86 |
| 21 | Cao he ru dian kou       | inflow area | 0.19 | 0.21 | 0.39 | 0.41 | 0.47 | 1.62 |
| 22 | Cao he                   | inflow area | 0.20 | 0.22 | 0.46 | 0.49 | 0.64 | 2.21 |
| 23 | Qiao nan qiao bei cun    | inflow area | 0.22 | 0.24 | 0.27 | 0.29 | 0.56 | 1.93 |
| 24 | Liu kou                  | inflow area | 0.16 | 0.18 | 0.23 | 0.24 | 0.33 | 1.14 |
| 25 | Tang he (jiu he dao)     | inflow area | 0.27 | 0.30 | 0.37 | 0.39 | 0.37 | 1.28 |
| 26 | Tang he (to kou)         | inflow area | 0.13 | 0.14 | 0.25 | 0.27 | 0.22 | 0.76 |
| 27 | Xiao yi he ru dian kou   | inflow area | 0.24 | 0.27 | 0.34 | 0.36 | 0.48 | 1.66 |
| 28 | Xiao yi he (pu kou)      | inflow area | 0.19 | 0.21 | 0.38 | 0.40 | 0.47 | 1.62 |
| 29 | Sai li shang             | inflow area | 0.09 | 0.10 | 0.22 | 0.23 | 0.54 | 1.86 |
| 30 | Ge cun                   | inflow area | 0.16 | 0.18 | 0.26 | 0.28 | 0.53 | 1.83 |

**Table S5.**Summary of HQ values in water

| Rivers        |                       | BBP   | DEP   | DBP    | DEHP   | DIBP   |
|---------------|-----------------------|-------|-------|--------|--------|--------|
| Baiyangdian   |                       | -     | -     | 0.277  | 1.434  | 0.176  |
| Lake          | Middle reaches of     | 0.010 | 0.011 | 0.223  | 0.034  | -      |
| Yangtze River | Jiangsu section       |       |       |        |        |        |
|               | Lower jiangsu section | 0.010 | 0.011 | 0.112  | 0.034  | -      |
|               | Zhenjiang             | -     | 0.502 | 13.383 | 35.207 | 13.956 |
|               | Nanjing               | 0.010 | 0.027 | 0.198  | 3.872  | -      |
|               | Suzhou                | -     | 0.002 | -      | -      | -      |
|               | Yangcheng Lake        | 0.073 | 0.016 | 7.647  | 58.421 | -      |
|               | Taihu Lake            | 0.505 | 0.136 | 1.691  | 4.448  | -      |
| Yellow River  | Lanzhou               | -     | 0.086 | 0.846  | 2.859  | 0.537  |
|               | Middle and lower      | -     | 0.068 | 14.936 | 58.966 | -      |

---

|               |                    |       |       |       |        |        |
|---------------|--------------------|-------|-------|-------|--------|--------|
| Haihe River   | reaches            |       |       |       |        |        |
|               | Summer Palace      | 0.006 | 0.001 | 0.356 | 0.900  | 0.294  |
|               | Guanting reservoir | 0.481 | -     | 0.324 | 0.300  | 0.341  |
| Liao River    | Lakes Shichahai    | 0.185 | 0.002 | 0.070 | 0.824  | 0.198  |
|               | Pu River           | -     | 0.030 | 1.245 | 3.552  | 12.444 |
| Pearl River   | Xi River           | -     | 0.093 | 2.287 | 2.397  | 3.422  |
| Jiulong River |                    | -     | 0.009 | 9.032 | 19.379 | -      |
| Songhua River |                    | -     | 0.016 | 0.713 | 6.000  | 3.740  |
| Chaohu Lake   |                    | 2.515 | 0.445 | 5.447 | 0.679  | -      |
|               |                    | 0.072 | 0.027 | 3.432 | 0.679  | -      |

---

-: No data.

**Table S6.**Summary of HQ values in sediments

| <b>Rivers</b>   | <b>BBP</b> | <b>DEP</b> | <b>DBP</b> | <b>DEHP</b> | <b>DIBP</b> |
|-----------------|------------|------------|------------|-------------|-------------|
| Songhua River   | 0.006      | 0.004      | 1.115      | 8.454       | -           |
| Jiulong River   | -          | 0.001      | 0.301      | 1.649       | 2.800       |
| Taihu Lake      | 1.466      | 0.553      | 2.291      | 6.147       | -           |
| Yongding River  | -          | 0.013      | 0.216      | 1.401       | 15.000      |
| Yellow River    | -          | 0.271      | 94.437     | 333.119     | -           |
| Yangtze River   | -          | 0.300      | 321.990    | 285.309     | -           |
| JiangHan Plain  | 0.092      | 0.451      | 0.380      | 0.768       | 12.780      |
| Qiantang River  | 0.024      | 0.053      | 0.315      | 8.040       | 15.380      |
| Pearl River     | 0.180      | 0.043      | 6.099      | 10.992      | -           |
| Taiwan river    | 2.029      | 0.266      | 39.660     | 30.799      | -           |
| Taiwan's rivers | 3.495      | -          | 1.702      | 59.923      | -           |

---

|               |   |       |       |        |         |
|---------------|---|-------|-------|--------|---------|
| Kaohsiung     | - | -     | 1.715 | 44.845 | -       |
| Harbor,Taiwan | - | 0.048 | 3.181 | 10.696 | 224.000 |
| Xi river      | - | 0.014 | 0.398 | 57.34  | 8.080   |
| Pu river      |   |       |       |        |         |

---

-: No data
